1 Evolution of colonial life history in styelids tunicates involves changes in  
2 complexity patterns

3 Stefania Gutierrez<sup>1,2\*</sup>

4  
5 <sup>1</sup>Instituto de Biociências, Departamento de Zoologia, Universidade de São Paulo, USP. Rua do  
6 Matão tv 14-N 321

7 <sup>2</sup>Calima, Fundación para la Investigación de la Biodiversidad y Conservación en el Trópico, Cra  
8 67A #33B 16 Cali, Colombia, [www.fundacioncalima.org](http://www.fundacioncalima.org)

9

10

11

12 Author ORCID: <https://orcid.org/0000-0002-6560-7706>

13 \* Corresponding Author: [stefania.gutierrez@fundacioncalima.org](mailto:stefania.gutierrez@fundacioncalima.org),

14

15

16

17

18

19

20

21

22

23

24

25 **Abstract**

26 Biological complexity is defined as the number of modules that compose an organism or a  
27 biological system, the type of interactions between these modules, and new hierarchies that describe  
28 these interactions. These patterns in biological complexity are changing during the evolution of life-  
29 histories, such as the evolution of coloniality in animals. In relation to coloniality, it is possible to  
30 observe an increment in all the aspects defined in the concept of biological complexity. First, in  
31 colonial animals, there is an increment in the modules that compound the system (i.e. zooids)  
32 compared with a solitary organism in which the multicellular individual a unity. Consequently, this  
33 transformation of the multicellular individual, in a component of the modular architecture in  
34 colonies, involves an increase in the regulatory processes of colonial system. This is precisely the  
35 case of the colonial life history evolution from solitary ancestors in the Styelids tunicates.  
36 Therefore, the main question of this study is How is the regulation of the asexual developmental  
37 processes that occurred simultaneously in the modules of the colonies? This question was studied,  
38 by the research of colonial strategy in the styelid *Symplegma*. Using in vivo observations of the  
39 budding process, description and classification of the extra-corporeal blood vessels system and the  
40 blood cells, by cytohistological assays. The conclusion is that the regulation of the simultaneous  
41 developmental processes that occurred in *Symplegma* colonies is mediated by the system of extra-  
42 corporeal blood vessels, which maintain physically the cohesion of the individuals, the plasma, and  
43 migratory blood cells transport signals between the individuals of the colonies.

44

45 **Keywords:** complexity, colonial life-history, *Symplegma*, Styelidae, tunicate, modularity, blood  
46 cells.

47

48

49

## 50 **1. Introduction**

51 “Evolutionary change involves the increasing complexity of a feature already present in ancestors”

52 Stephen Jay Gould, from *Ontogeny and Phylogeny*, 1977

53

54 Gould (1977, pp 268-269) suggested that an increase in complexity is an inevitable condition for  
55 evolution by acceleration of developmental processes. Complexity in biology is used to refer  
56 number of cell types, body parts, or biological processes (McShea 1996)□. Increase or reduction in  
57 number of these characters, results in changes of complexity patterns (McShea 2017)□.

58

59 Complexity is a useful concept to understand how developmental mechanisms,  
60 environmental conditions and natural selection are acting in evolution of new life histories.  
61 Clarifying, this does not imply a directionality in evolution. On the contrary, the idea is that  
62 complexity is a useful concept to understand the evolution of new life histories- “We will be  
63 interested in the whole pattern of change, not just the increases ... but also the decreases, the  
64 frequent retreats into simplicity”-as McShea (2017, pp 2) proposed. In biological systems  
65 complexity is represented by the number of modules (e.g. cell type, leg-pair type, zooids, polyps)  
66 that compose an organism, the type of interactions between these modules, new biological  
67 hierarchies or nestedness processes that describe these interactions (McShea 1996, 2017; Adami  
68 2002)□, and also the capacity of self-organization in biological systems (Yaeger 2009).

69

70 Evolution of colonial life history in animals is one example of the change in the complexity  
71 patterns. These changes are observed in the modularization of multicellular individuals, forming the  
72 colony as a new biological hierarchy (Davidson et al, 2004)□; or by new types of interactions of

73 these modules, such as the cellular migration and the molecules involved in communication  
74 between modules (Lauzon et al., 2007)□; or by self-organization, such as the rearrange of  
75 extracorporeal blood vessels to maintain homeostasis after a disturbance (Rodriguez et al. 2017)□.

76

## 77 **1.2. Evolution of colonial life history in Styelidae from a solitary ancestor, implies the increase** 78 **of characters complexity in colonial descendants**

79

80 Tunicates are useful to understand changes in patterns of complexity related to the colonial  
81 life history. Colonial tunicates evolved multiple times, in pelagic and benthic environments (Kocot  
82 et al., 2018).□ Such as, in the tunicate family Styelidae, colonial life history evolved by  
83 convergence two times from solitary ancestors (Alié et al. 2018)□. Evolution of colonial animals  
84 involved the increase in the number of modules, interactions, hierarchical processes and self-  
85 organization of the colonies (Fig.1) (Ballarin et al. 2008; Gutierrez and Brown 2017; Alié et al.  
86 2018)□. Although, evolution of colonial life history increased the complexity patterns in Styelids.

87

88 Genus *Symplegma* is one of the colonial animals in Styelidae. *Symplegma* colonies are  
89 composed by zooids, and a extra-corporeal vessel system with specialized blood cells that circulate  
90 constantly(Mukai & Taneda, 1978)□. New buds appear from the evagination of vessels and  
91 epitheliums from adult zooids. Blood vessel system is very dynamic, buds move during  
92 development. Buds formed from adult zooids, move far away from parental zooid, by the formation  
93 of a new vessel to connect to the general vessels system of the colony. Vessels have the capacity to  
94 rearrange in case of different disturbance and external stimulus. Such as, in the whole-body  
95 regeneration, blood vessels pump blood by themselves, allowing cells circulation and regeneration  
96 (Sugimoto and Nakauchi 1974; Gutierrez and Brown 2017)□. In absence of young buds, by  
97 systematical removals, new buds are formed and developed faster. This suggest that the asexual

98 development of zooids is modulate by mechanisms at the colony level (Gutierrez and Brown  
99 2017)□.

100 Solitary life form is consider the ancestral character in Styelidae (Kott 2005; Zeng et al.  
101 2006; Alié et al. 2018)□. Thus, evolution of *Symplegma* colonial strategy, involved the develop of  
102 more complex characters in comparison with solitary forms. Modularization of multicellular  
103 individuals in colonies, implies modularization of developmental processes (e.g morphogenesis and  
104 aging). These developmental processes are occurring simultaneously, one of the main innovation of  
105 the colonies in comparison with the solitary forms (Jackson & Coates, 1986; Jackson & Hughes,  
106 1985). These processes are spatially and temporary impossible in solitary animals. Evolution of  
107 colonial life history is related with the increase of complexity in characters, such as extra-corporeal  
108 vessels; diversification of blood cells; and regulatory mechanisms to modules coordination.

109

110 The developmental processes are modularized in *Symplegma* zooids. Simultaneously a bud  
111 is forming, by a process analogous to a gastrulation; another bud is differentiated its organs; the  
112 fully differentiated zooid is filtering and feeding the colony; and an old zooid is aging and dying  
113 (Kawamura and Nakauchi 1986; Gutierrez and Brown 2017)□. The main question of this study is  
114 try to understand How is the regulation of the asexual developmental processes that occurred  
115 simultaneously in *Symplegma* colonies?

116 The premises to answer this question are: (a) all the modules of the colony are  
117 interconnected by a blood vessel system in which blood cells are in constant circulation (b) there are  
118 specific type of blood cells related with main biological processes of the colonies, such as  
119 phagocytosis, budding and regeneration, allrecognition and storage cells, (c) external disturbances  
120 such as systematical remotion of modules (zooids or buds), cause changes in the proportion of the  
121 type blood cells, and alterations in the asexual development of the colony (Cima et al, 2001; Franchi  
122 et al., 2016; Gutierrez & Brown, 2017; Lauzon et al., 2007).□

123

124           Therefore, the proposed hypothesis is that *the regulation of the simultaneous developmental*  
125 *processes that occurred in Symplegma colonies are mediated by the modularization of these*  
126 *developmental processes. To coordinate these simultaneous processes new blood cells types evolved*  
127 *diversifying in relation with biological functions associated to specific developmental stages (e.g*  
128 *progenitor cells related to early buds, phagocytes related to old zooids). In Symplegma clade*  
129 *evolved a cellular based communication system where signals are transmitted between modules (*  
130 *i.e zooids) by migratory blood cells and molecules diffused in plasma.*

131

132           To test this hypothesis the development of *Symplegma rubra* and *S.brakenhielmi* was  
133 observed, from the oozoid to adult colonies, to understand the formation of a colony from a first  
134 module. The colonial strategy in *S.rubra* was unknown, thus *S.rubra* budding and the blood cell  
135 types were characterized, comparing with the information reported before for *S.brakenhielmi*.  
136 Some blood cell types have an active behavior and fast movements. These cellular behaviors were  
137 observed and record in videos, to understand cellular behaviors associated with blood cell types.  
138 Blood cells were identified and counted, in the morphogenesis stages and aging stages. Comparing  
139 the types of blood cells at these these simultaneous stages. Finally the aging process of the zooids  
140 was describe to identify if is a programmed cell death, like in other colonies,or a senescent process.

141

## 142 **2. Materials and Methods**

143

### 144 **2.1. Colonies and budding characterization**

145           *Symplegma rubra* and *S. brakenhielmi* colonies were collected from floating structures in  
146 the Yatch Club IlhaBela-YCI (Ilhabela, São Paulo, Brazil). Fragments of colonies were attached to

147 microscope slides and kept in open cages. Cages were immersed in the water from floating docks  
148 for three weeks. Grown colonies were cleaned and transported to the laboratory at Universidade de  
149 São Paulo. Colonies were maintained at 25° C and fed with a mixture of living algae (*Isochrysis*,  
150 *Thalassiosira*, *Pavlonia*, *Nanochloropsis*) and commercial food. Colonies were observed under  
151 stereomicroscope Leica M205 FA. Colonies at the reproductive stage were transported to the Centro  
152 de Biologia Marinha da Universidade de São Paulo – *CEBIMar*. The larvae released from the  
153 colonies were obtained and transferred to microscope slides to observe them.

154

## 155 **2.2. Blood cell characterization**

156 For the blood cells extraction was followed a previously described protocol (Cima 2010)□,  
157 with some changes to improved obtained results (See supplementary material 5.3 chapter 4).  
158 Colonies were immersed in anticoagulant for 5 minutes. Then ampullae were gently cut and blood  
159 was extracted. Anticoagulant was washed by centrifugation (10 minutes-3000 rpm), and the blood  
160 cells were resuspended in a solution of 1/3 anticoagulant-2/3 filtered sea water (FSW). The blood  
161 cells were attached to microscopy slides coated with Poly-L-Lysine. Afterwards the attached blood  
162 cells were stained using cytological techniques to observe the diversity and classify. Living blood  
163 cells were stained with a neutral red solution ( 8mg/l in FSW) to observe acid cellular  
164 compartments. Blood cells were fixed with 4% paraformaldehyde in FSW and stained with  
165 Hematoxylin and eosin (H&E) or Giemsa 10%, to identify the cellular morphology. Blood cells  
166 were observed and photographed using the inverted microscope Leica DMi8.

167

## 168 **2.3. Cellular behavior**

169 Blood cells were collected as mentioned above. The cells were added to coverslips coated  
170 with laminin ( 50 µg/mL) and filmed under a microscope Zeiss AxioVert A1, equipped with the

171 Canon DSLR camera. Images were recorded every 3 seconds and processed in the photo editing  
172 free software Darktable.

173

#### 174 **2.4. Blood cells identification in the bud morphogenesis and aging zooids**

175 *Symplegma rubra* and *S. brakenhielmi* colonies were fixed in paraformaldehyde 4% in FSW  
176 overnight and afterwards washed with PBS. Fixed colonies were dehydrated by ethanol series  
177 (25%, 50%, 70%, 80%, 90%, 100%) and two xylol washes and embedded in paraffin to be  
178 sectioned. Serial sections of 5µm thickness, perpendicular to the longitudinal axis of the zooids  
179 were obtained using a microtome. Sections were mounted on glass slides, deparaffinized and  
180 rehydrated with the inverse ethanol series mentioned before. The tissue slides were stained with  
181 H&E, mounted with Entellan and examined under a Zeiss AxioVert A1 light microscope. The  
182 proportion of the types of blood cells was calculated by counting the cells in the early stages of  
183 budding (double vesicle, stage.5) and in the aging stages of the old zooids (stage 11). These buds  
184 and zooids were in the same colony, thus the analyzed stages were present simultaneously in the  
185 colonies. All the blood cells inside the zooids and buds were counted in four sections every 20 µm,  
186 in the smallest buds were counted two sections every 10 µm. Tukey and Bonferrni tests were used  
187 to determine significant differences between blood cells proportion in the budding stages.

188

#### 189 **2.5. Characterization of aging zooids**

190 Old zooids were observed *in vivo* in colonies of *Symplegma rubra* and colonies of *S. brakenhielmi*.  
191 From these *in vivo* observations and the resorption stages reported in *Botryllus schlosseri* were  
192 established homologous stages in *Symplegma*. The morphology of these resorption stages was  
193 described by histological slides stained with H&E as mentioned above.

194



## 195 **3. Results**

### 196 **3.1 Development of a *Symplegma* colony**

197 *Symplegma rubra* and *S.brakenhielmi* are species with a similar strategy of coloniality. The  
198 colonies are formed by modules (zooids and buds) interconnected by a systems of blood vessels  
199 with circulating blood cells. The formation of buds is a constant process and the budding occurs  
200 asynchronously in contrast with other species, such as the botryllids. *Symplegma* colonies are  
201 characterized by the formation of extension and growth zones. The location of the extended  
202 ampullae and the buds (Fig. 2A-B). Growth area redirects the growth of the colony. Colonies were  
203 capable of small movements and the positions of the zooids change dynamically across the blood  
204 vessels system.

205

206 The colonies were reproductive during all the year, specially from December to February, the  
207 summer season at the south of Brazil. The reproduction is by internal fertilization and the larval  
208 development by brooding. Fully developed larva is approximately 2mm long, and has a circular  
209 head with sensorial papillae in the anterior part The tail has the notochord, the dorsal nerve and  
210 muscles. The beating of the tail propels the larva, which can swim for up to 12 hours before  
211 settlement (Fig. 2C). The metamorphosis starts with the resorption of the tail and the formation of  
212 the first zooid (i.e oozoid). At the beginning of the oozoid development some larval structures are  
213 remanent such as the ocellus and otolith (Fig. 2D). In *Symplegma brakenhielmi* and *S.rubra* the  
214 eight primordial ampullae form a remarkable symmetric pattern (Fig. 2D-C). Inside of these  
215 primordial ampullae, blood cells were circulating. Simultaneously with the formation of pharynx  
216 and internal organs of oozoid, the ampullae were growing and fusions forming the primordial  
217 blood vessels system (Fig. 2F). After a week of the settlement the blood vessels system ramifies and  
218 the fully differentiated oozoid open the siphons to feed. One day after, the siphon apertures were  
219 observed on the first buds (Fig. 2G -H). The lifespan of the oozoid is approximately 20 days, then

220 the zooids and buds are developing and the blood vessels are forming. It is the beginning of the  
221 formation of a colony.

222 The formation of the colonies was very similar between the two *Symplegma* species,  
223 however the budding in *S.rubra* is by paleal budding (i.e buds are formed by the evagination of the  
224 pharyngeal and external epitheliums of the parental zooid). In contrast to *S.rubra*, in which budding  
225 is exclusively paleal, *S.brakenhielmi* has simultaneously paleal and vascular budding.

226

227 Budding in *Symplegma rubra* was characterized by eleven stages. The stages 1 to 3 are the  
228 formation of the budlet from the parental bud. Stage 4 is the beginning of folding of internal  
229 epitheliums to form the organs, analogous to gastrulation. Organogenesis occurs during stages 5 to  
230 8, with tissues differentiation and formation of all the internal organs. Finally in stage 9 the zooid is  
231 fully functional and starts to filter. Lastly, the zooid starts a senescent process and it is resorb by the  
232 colony. The stages were established following Berrill (1941)□ and Sabbadin (1955)□ nomenclature  
233 and compare with the homologous stages previously reported in *S. brakenhielmi* and botryllids.

234

### 235 **3.2. Blood cells of *Symplegma rubra***

236 The blood cells in *Symplegma rubra* are composed by a variety of cellular populations,  
237 characterized by cytological morphology. Some of the populations are cells with characteristics of  
238 precursors. The other populations were characterized in three functional lineages: phagocytes, cells  
239 for allorecognition, and storage cells (Fig. 3AB).

240

241 *Hemoblasts (HE)*: cells with a size between 3-4  $\mu\text{m}$ . HEs have a round regular cytoplasm  
242 with a high nucleus-cytoplasmic ratio. The cytoplasm has a small number of organelles, for that  
243 HEs are negative to neutral red (this dye stains cellular acid compartments). The nucleolus is clearly

244 visible with hematoxylin and eosin (H&E) stain. The nucleus is stained blue with Giemsa (Fig. 3A-  
245 C).

246 *Hemocyte (H1)*: cells with a size between 5-6 $\mu$ m. H1s have a regular cytoplasm with a high  
247 nucleus-cytoplasmic ratio and small number of organelles. The living H1s are negative to neutral  
248 red, and a strong basophilic stain in the nucleus with H&E. The nucleus and small vesicles are  
249 stained blue with Giemsa (Fig. 3D-F).

250 *Hemocyte (H2)*: cells with a size between 6-7  $\mu$ m. H2s are round shaped and have some  
251 granules in the cytoplasm. In living H2s the cytoplasm is stained with neutral red suggesting the  
252 content of acid compartments. The eccentric circular nucleus is characterized by a strong color in all  
253 the dyes (neutral red, H&E, and Giemsa) (Fig. 3G-I).

254 *Hyaline amoebocyte (HA)*: cells with a size between 4-6  $\mu$ m. HAs have an irregular amoeboid  
255 cytoplasm with small number of organelles. HAs are negative to neutral red dye and the cytoplasm  
256 has a clear color in all dyes. HAs have a high nucleus-cytoplasmic ratio, nucleus has a strong  
257 basophilic color with H&E and blue color with Giemsa (Fig. 3J-L).

258 *Morula cell (MC)*: cells with a size between 8-10  $\mu$ m. MCs have an irregular cytoplasm full of  
259 homogeneous round vesicles. MCs are positive to neutral red dye, suggesting an acid content in  
260 their vesicles. Cytoplasm has a strong brownish-dark red color in all the dyes. The nucleus is small  
261 stained purple with H&E and blue with Giemsa (Fig. 3M-O). MCs have an active movement  
262 (Video. 1).

263 *Macrophage-like cell (MLC)*: cells with a size between 10-12  $\mu$ m. MLCs have huge  
264 vacuoles and some heterogeneous vesicles. MCs are positive to neutral red, suggesting acid content  
265 in the vacuoles. MCs have strong yellowish-orange color with H&E and Giemsa. The nucleus is  
266 eccentric and small, visible with Giemsa (Fig. 3P-R).

267 *Granular amoebocyte (GA)*: cells with a size between 10-15  $\mu\text{m}$ . GAs have an irregular  
268 amoeboid cytoplasm with pseudopods. The cytoplasm contains granules with light colors stained  
269 with H&E and negative to neutral red (Fig. 3S-T). GAs have an active movement (Video. 2).

270 *Nephrocyte (N)*: cells with a size between 8-20  $\mu\text{m}$ . Ns have a round or hourglass shape.  
271 The cytoplasm contains dense granules with Brownian movement. Ns are stained brownish-  
272 yellowish with neutral red, H&E and Giemsa, suggesting acid content in the cytoplasm (Fig. 3U-  
273 W).

274 *Pigment cell (PC)*: cells with a size between 8-15  $\mu\text{m}$ . PCs have an irregular cytoplasm with  
275 granules inside. PCs in *Symplegma rubra* are red in color, probably related with the characteristic  
276 color of this specie. Some granules are stained with neutral red (Fig. 3X-AA).

277 This diversity of blood cells in *Symplegma* colonies, is associated with specific cellular behaviors.  
278 Morula cells and amoebocytes show dynamic movements, specially amoebocytes with the pseudopods.  
279 These faster cellular movement can be involved in the biological processes and communication  
280 between zooids in colonies (Video 1.-2).

281

### 282 **3.3. Buds morphogenesis**

283 In *Symplegma rubra* the right side of the peribranchial epithelium of buds is thick. From this  
284 thickening a budlet starts to form in a parental bud stage 5. This budlet expand and growth forming  
285 a double vesicle (stage. 3) from the peribranchial epithelium and external epithelium of the parental  
286 bud (Fig. 4A,C). The bud separates from its parental zooid and a new blood vessel is forming from  
287 the bud to the colonial systems of vessels (Fig. 2B). The bud increase in size and the internal vesicle  
288 starts to fold, forming the pharynx and stomach primordium (Fig. 4D). Buds in *S. brakenhielmi* are  
289 formed by pallear budding and from vessels as was reported before (Gutierrez & Brown, 2017)□.  
290 The pallear body in *S.brakenhielmi* and *S. rubra* follow the same pattern.

291

292 Blood circulation is observable inside buds since double vesicle stage (St.3) and continues  
293 during all the asexual development. Blood cells with characteristics of precursors (i.e as hemoblasts  
294 and hyaline amebocytes) were observed in the morphogenesis of buds. During the bud development  
295 increase the number of macrophage-like cells (Fig. 4C,D,G,H). Hemoblasts, hyaline amebocytes  
296 and pigment cells were statistically more frequent in double vesicles than in old zooids for the two  
297 *Symplegma* species (Fig. 6).

298

### 299 **3.4. Resorption of old zooids**

300 Stage 11 is the final stage in *Symplegma* budding. The lifespan of the fully differentiated  
301 zooid is between 3 and 3.5 days in the two *Symplegma* species. The first step of the final stage 11.1  
302 is the closure of siphons. When touched siphons did not react, as mentioned by Ballarin et al.,  
303 (2008) for *Botryllus schlosseri* (Fig. 5A, D). After twelve hours the stage 11.2 started, with the  
304 longitudinal antero-posterior contraction of the body. (Fig. 5 B, E). During this stage pharynx and  
305 stomach epithelia initiated a disintegration, by the separation of epithelial cells. Macrophage-like  
306 cells began to accumulate around pharynx and stomach (Fig. 5G). At stage 11.3 the size of the  
307 zooid reduced dramatically, and the heart beating was slower. The disintegration of the internal  
308 organs was clearly observable, and the body was inundate by macrophage-like cells. The blood that  
309 circulate around the old zooids was denser than around young zooids. These macrophage-like cells  
310 were seen moving outside from the old zooid, probably with the resorbed tissues. Finally mostly of  
311 the tissues of the old zooid were phagocyted and moved outside from the body and the heart beating  
312 stopped (Fig. 5C, F, H). Remanent of tunic and tissues stayed during two days before the resorption  
313 was complete. During the resorption stage the proportion of macrophage-like cells was significantly  
314 bigger than in young bud of the same colony. In *Symplegma rubra* the proportion of morulas was  
315 significantly bigger than in young bud (Fig. 6). The resorption process has similar pattern in the two  
316 *Symplegma* species.

317

## 318 **4. Discussion**

319

### 320 **4.1. Modularity of a multicellular individual by the development of a colony of zooids**

321 The colonies in *Symplegma* have defined areas, characterized by specific biological  
322 processes: extension area, with the younger buds in morphogenesis; area of fully differentiated  
323 zooids; and the regression area, with the aging zooids (Fig. 2A-B). The extension area is more  
324 evident in colonies that are growing, like the cultured colonies that were growing from their natural  
325 substratum to the glass slides. This suggests that the extension area redirect growth of the colony,  
326 probably related with the perception of good environmental conditions received for ampullae. The  
327 oozoid in development and the primordial ampullae form a symmetric pattern with eight ampullae.  
328 This remarkable pattern was conserved in *S.rubra* and *S.brakenhielmi* oozoids (Fig. 2 D-E).

329

330 Simultaneously with the development of the oozoid, beginning the formation of blood  
331 vessels system by the fusion of primordial ampullae (Fig. 2F). The extra-corporeal system of  
332 vessels is an essential part in the colonial strategy in *Symplegma*. Blood vessels systems maintain  
333 cohesion and homeostasis of the colony. Vessels have the capacity to rearrange in case of external  
334 disturbance (Gutierrez & Brown, 2017)□; or by the dormancy at cold season, by the resorption of  
335 all zooids maintaining only the blood vessel system (Hyams et., 2017). The plasticity of the blood  
336 vessels system is decisive in the capacity of self-organization of the colonies. As a result  
337 *Symplegma* colonies are more resilient to external disturbances, in comparison with solitaries  
338 species.

339

340 **4.2. Blood cell types distribution regulates the modularization of developmental processes in**  
341 **colonies**

342 The blood cell types described in *S.rubra* (FIG.3) are very similar to *S.brakenhielmi* and  
343 botryllids, as well as other phylogenetically more distant colonial tunicates (Cima et al., 2001;  
344 Gutierrez & Brown, 2017; Hirose et al., 2003)□. These results suggest that this variety of blood cells  
345 are related with colonial life history.

346 One of the main characters of *Symplegma* coloniality is the simultaneous budding stages.  
347 The blood cells are continuously circulating and their proportions are constant all the time around  
348 the colony. In contrast to the botryllids, in which the blood cells proportions have fluctuating cycles  
349 in relation with the budding stage of the colony (Ballarin, Menin, et al., 2008)□. In botryllids all the  
350 zooids are in the same stage, because the asexual development of the zooids is synchronized  
351 (Lauzon et al., 2002)□.

352 In *Symplegma* double vesicle stage (st.3) hemoblasts (HE) and hyaline amebocytes (HA)  
353 were significantly more frequent, than in aging zooids (Fig. 4, Fig 6). In addition, macrophage-like  
354 cells (MLC) and morula cells (MC), were significantly more frequent in aging zooids. Suggesting a  
355 different location of the blood cells types related with the stage of the zooids and the specific  
356 developmental processes occurring in each stage. Thus, precursor cells (HE, HA) are located in  
357 buds during the morphogenesis. Probably these cells interact with the double vesicle epithelia in  
358 the cellular differentiation and migration before organogenesis (Brown et al., 2009)□. Phagocytes  
359 (MLCs) and cells for allorecognition (MCs) are located predominately in the aging zooids. The  
360 phagocytes have an active role in the resorption and recycling tissues of the aging zooids (Lauzon  
361 et al., 1993).

362 Dynamic cellular behaviors of amebocytes and morula cells, can be involved in the  
363 biological function of these cells (i.e buds morphogenesis and immune responses). These cells  
364 migrate in the blood cells and inside zooids and buds, regulation budding, regeneration and immune

365 responses. This faster cellular movements can be a factor related with plasticity of colonies to  
366 external disturbances. As well is a interesting source of unexplored biological information.

367

368 **4.3. Aging in *Symplegma* is a regulate process involving programmed cell death and**  
369 **phagocytosis**

370 The steps described in the stage 11 in *Symplegma* are very similar with the resorption stage  
371 described for botryllids (Ballarin, Burighel, et al., 2008). Beginning with the siphons closure,  
372 followed by the disintegration of epitheliums and an accumulation of MLCs around the pharynx and  
373 stomach (Fig. 5). Posteriorly, the epithelium cells and internal tissues start massive apoptosis.  
374 Finally these apoptotic bodies are reabsorb by phagocytes to move them outside from the aging  
375 zooids. Thus, the programmed aging of the old zooids and the resorption of these tissues by the  
376 colony are processes that evolve in the clade *Symplegma* + *Botryllids* (Ballarin, Menin, et al., 2008;  
377 Lauzon et al.,1992)□. Suggesting the develop of new and complex biological processes related to  
378 colonial life history. This programmed aging and the recycling of old zooids by this phagocytosis  
379 serie are innovations of colonies, suggesting an increase in the complexity pattern in the evolution  
380 of coloniality.

381

382 In conclusion this results support the hypothesis that the regulation of the simultaneous  
383 developmental processes in *Symplegma* is related by the distribution and modulation of this variety  
384 of blood cells types. Therefore, it is probable that the regulation of budding is also related with  
385 vascular and zooids epitheliums. This regulation could be mediated by committed epitheliums,  
386 which interact with undifferentiated blood cells to start the asexual development.

387

388 **4.4. Evolution of colonial life history in Styelidae: a case of natural selection favoring increase**  
389 **in complexity?**



390           The colonial life history evolved in Styelidae by different developmental mechanisms,  
391 during two independent events (Alié et al., 2018)□. However the concept of transform the unique  
392 individual in solitaries in a clonal module, it is convergent in the different colonial strategies. This  
393 colonial life history evolved by convergence in other marine pelagic animals. Such as, cnidarians,  
394 bryozoans and hemichordates (Davidson et al., 2004)□. This support the idea that in some marine  
395 environments the coloniality can be a successful strategy.

396

397           Specifically in Styelidae the organisms are sessile filter-feeders, thus colonial strategy can  
398 give some advantages to survive. The colonies act as self-regulating systems that can rearrange it  
399 components ( i.e zooids and blood vessels) to maintain the homeostasis in case of a disturbance. An  
400 example of this self-organization is the regeneration process. when a portion of the colony is lost or  
401 in the whole-body regeneration. In which the remanent modules of the colony ( i.e., zooids, buds  
402 and vascular tissues) rearrange themselves to replace the lost parts (Brown et al., 2009; Gutierrez &  
403 Brown, 2017).

404

405           Evolution of coloniality from a solitary ancestor involved an increase in complexity, such as  
406 Styelidae example. Therefore, in colonial animals increase the number of modules, number of  
407 biological hierarchies (e.g colonial hierarchy) and nestedness processes (e.g sexual reproduction  
408 and budding to form colonies). In Styelidae complexity increases with evolution of colonial  
409 animals, also coloniality evolved and probably disappear several times in tunicates (Kocot et al.  
410 2018)□ and in general in metazoans (Davidson et al. 2004; Scrutton 2015; Hiebert et al. 2020)□,  
411 these events involving changes in the complexity patterns. Life evolved without a directionality in a  
412 spectacular diversity of life forms, the study of complexity patterns can provide a useful way to  
413 understand the process of life evolution.

414 **Acknowledgments:** This research was supported by CAPES Brazilian agency, and the grant n°  
415 2015/22650-2 from São Paulo Research Foundation (FAPESP). Many thanks to the *CEBIMar*,  
416 Laboratory of Protist evolution, and EvoDevo Laboratory, from Universidade de São Paulo for the  
417 technical support.

418

419

420

421

422

423

424

425

426

427

428

429

430

431

432

433

434

435

436

437

438 **5. References**

439

440 Adami, C. (2002). What is complexity? *Bioessays*, 24, 1085–1094.

441 <https://doi.org/10.1002/bies.10192>

442 Alié, A., Hiebert, L. S., Simion, P., Scelzo, M., Prünster, M. M., Lotito, S., ...

443 Tiozzo, S. (2018). Convergent acquisition of nonembryonic development in

444 styelid ascidians. *Molecular Biology and Evolution*, 35(7), 1728–1743.

445 <https://doi.org/10.1093/molbev/msy068>

446 Ballarin, L., Burighel, P., & Cima, F. (2008). A tale of death and life: natural

447 apoptosis in the colonial ascidian *Botryllus schlosseri* (Urochordata, Ascidiacea).

448 *Current Pharmaceutical Design*, 14(2), 138–147.

449 <https://doi.org/10.2174/138161208783378798>

450 Ballarin, L., Menin, A., Tallandini, L., Matozzo, V., Burighel, P., Basso, G., ...

451 Cima, F. (2008). Haemocytes and blastogenetic cycle in the colonial ascidian

452 *Botryllus schlosseri*: a matter of life and death. *Cell and Tissue Research*, 331(2),

453 555–564. <https://doi.org/10.1007/s00441-007-0513-4>

454 Berrill, N. J. (1941). The Development of the Bud in *Botryllus*. *Biological Bulletin*,

455 80(2), 169–184. <https://doi.org/10.2307/1537595>

456 Brown, F. D., Keeling, E. L., Le, A. D., & Swalla, B. J. (2009). Whole body

457 regeneration in a colonial ascidian, *Botrylloides violaceus*. *J Exp Zool B Mol Dev*

458 *Evol*, 312(8), 885–900. <https://doi.org/10.1002/jez.b.21303>

- 459 Cima, F., Perin, A., Burighel, P., & Ballarin, L. (2001). Morpho-functional  
460 characterization of haemocytes of the compound ascidian *Botrylloides leachi*  
461 (Tunicata, Ascidiacea). *Acta Zoologica*, 82(4), 261–274.  
462 <https://doi.org/10.1046/j.1463-6395.2001.00087.x>
- 463 Cima, F., Peronato, A., & Ballarin, L. (2017). The haemocytes of the colonial  
464 aplousobranch ascidian *Diplosoma listerianum*: Structural, cytochemical and  
465 functional analyses. *Micron*, 102(July), 51–64.  
466 <https://doi.org/10.1016/j.micron.2017.08.007>
- 467 Davidson, B., Jacobs, M., & Swalla, B. J. (2004). The individuals as a Module:  
468 Solitary-to-Colonial Transitions in Metazoan Evolution and Development. In G.  
469 Schlosser & G. Wagner (Eds.), *Modularity in Development and Evolution*.  
470 Chicago: The University of Chicago Press.
- 471 Franchi, N., Ballin, F., Manni, L., Schiavon, F., Basso, G., & Ballarin, L. (2016).  
472 Recurrent phagocytosis-induced apoptosis in the cyclical generation change of  
473 the compound ascidian *Botryllus schlosseri*. *Developmental and Comparative*  
474 *Immunology*, 62, 8–16. <https://doi.org/10.1016/j.dci.2016.04.011>
- 475 Fujimoto, H., & Watanabe, H. (1976). *Studies on the asexual reproduction in the*  
476 *polystyelid ascidian, Polyzoa vesiculiphora Tokioka*. *Journal of Morphology*  
477 (Vol. 150). <https://doi.org/10.1002/jmor.1051500302>
- 478 Gasparini, F., Manni, L., Cima, F., Zaniolo, G., Burighel, P., Caicci, F., ... Ballarin,  
479 L. (2015). Sexual and asexual reproduction in the colonial ascidian *Botryllus*

- 480 schlosseri. *Genesis* (New York, N.Y.: 2000), 53(1), 105–120.  
481 <https://doi.org/10.1002/dvg.22802>
- 482 Gutierrez, S., & Brown, F. D. (2017). Vascular budding in *Symplesma brakenhielmi*  
483 and the evolution of coloniality in styelid ascidians. *Developmental Biology*,  
484 423(2). <https://doi.org/10.1016/j.ydbio.2017.01.012>
- 485 Hiebert, L. S., E. A. Vieira, G. M. Dias, S. Tiozzo, and F. D. Brown. 2019. Colonial  
486 ascidians strongly preyed upon, yet dominate the substrate in a subtropical  
487 fouling community. bioRxiv 512699.
- 488 Hiebert, L. S., C. Simpson, and S. Tiozzo. 2020. Coloniality, clonality, and  
489 modularity in animals: The elephant in the room. *J. Exp. Zool. Part B Mol. Dev.*  
490 *Evol.* 1–14.
- 491 Hirose, E., Shirae, M., & Saito, Y. (2003). Ultrastructures and Classification of  
492 Circulating Hemocytes in 9 Botryllid Ascidians (Chordata: Ascidiacea). *Zoolog*  
493 *Sci*, 20(5), 647–656. <https://doi.org/10.2108/zsj.20.647>
- 494 Hyams, Y., Paz, G., Rabinowitz, C., & Rinkevich, B. (2017). Insights into the unique  
495 torpor of *Botrylloides leachi*, a colonial urochordate. *Developmental Biology*,  
496 428(1), 101–117. <https://doi.org/10.1016/j.ydbio.2017.05.020>
- 497 Kott, P. (2005). Novel Australian Polyzoinae (Styelidae, Tunicata). *Journal of*  
498 *Natural History*, 39(32), 2997–3011.  
499 <https://doi.org/10.1080/00222930500239702>

- 500 Lauzon, Ishizuka, K. J., & Weissman, I. L. (2002). Cyclical Generation and  
501 Degeneration of Organs in a Colonial Urochordate Involves Crosstalk between  
502 Old and New: A Model for Development and Regeneration. *Developmental*  
503 *Biology*, 249(2), 333–348. <https://doi.org/10.1006/dbio.2002.0772>
- 504 Lauzon, Ishizuka, K., & Weissman, I. (1992). A cyclical, developmentally-regulated  
505 death phenomenon in a colonial urochordate. *Dev Dyn*, 194(1), 71–83.  
506 <https://doi.org/10.1002/aja.1001940109>
- 507 Lauzon, Kidder, S. J., & Long, P. (2007). Suppression of programmed cell death  
508 regulates the cyclical degeneration of organs in a colonial urochordate.  
509 *Developmental Biology*, 301(1), 92–105.  
510 <https://doi.org/http://dx.doi.org/10.1016/j.ydbio.2006.08.055>
- 511 Lauzon, Patton, C. W., & Weissman, I. L. (1993). A morphological and  
512 immunohistochemical study of programmed cell death in *Botryllus schlosseri*  
513 (Tunicata, Ascidiacea). *Cell Tissue Res*, 272(1), 115–127.
- 514 McShea, D. W. (1996). Perspective metazoan complexity and evolution: is there a  
515 trend? *Evolution*, 50, 447–492.
- 516 McShea, D. W. (2017). Evolution of Complexity. In L. Nuño de la Rosa & B. Muller,  
517 Gerard (Eds.), *Evolutionary Developmental Biology*. Springer.  
518 <https://doi.org/10.1017/978-3-319-33038-9>
- 519 Pérez-Portela, R., Bishop, J. D. D., Davis, a R., & Turon, X. (2009). Phylogeny of  
520 the families Pyuridae and Styelidae (Stolidobranchiata, Ascidiacea) inferred from

521 mitochondrial and nuclear DNA sequences. *Molecular Phylogenetics and*  
522 *Evolution*, 50(3), 560–570. <https://doi.org/10.1016/j.ympev.2008.11.014>

523 Rodriguez, D., Braden, B. P., Boyer, S. W., Taketa, D. A., Setar, L., Calhoun, C., ...  
524 De Tomaso, A. W. (2017). In vivo manipulation of the extracellular matrix  
525 induces vascular regression in a basal chordate. *Molecular Biology of the Cell*,  
526 28(14), 1883–1893. <https://doi.org/10.1091/mbc.E17-01-0009>

527 Sabbadin, A. (1955). Il Ciclo Biologico Di Botryllus Schlosseri (Pallas) [Ascidiacea]  
528 Nella Laguna di Venezia. *Estrato Dall'Archivio Di Oceanografia e Limnologia*,  
529 10, 219–231.

530 Sugimoto, K., & Nakauchi, M. (1974). Budding, Sexual Reproduction, and  
531 Degeneration in the Colonial Ascidian, *Symplesma reptans*. *Biological Bulletin*,  
532 147(1), 213–226. Retrieved from <http://www.jstor.org/stable/1540579>

533 Tsagkogeorga, G., Turon, X., Hopcroft, R., Tilak, M.-K., Feldstein, T., Shenkar, N.,  
534 ... Delsuc, F. (2009). An updated 18S rRNA phylogeny of tunicates based on  
535 mixture and secondary structure models. *BMC Evolutionary Biology*, 9(1), 187.  
536 <https://doi.org/10.1186/1471-2148-9-187>

537 Yaeger, L. S. (2009). How evolution guides complexity. *HFSP Journal*, 3(5), 328–  
538 339. <https://doi.org/10.2976/1.3233712>

539  
540  
541  
542  
543

544 **6. Figures legends**

545 **Figure.1 Phylogenetic summary of the characters related with colonial life history evolution in**  
546 **Styelidae.** The proposed key characters for evolution of coloniality are: the specialization of blood  
547 cells; blood cells diversification to manage modules in colonies; budding and extra-corporeal tissues  
548 to interconnect zooids; programmed cells death of old zooids and their tissues recycling; the  
549 synchronized budding in botryllids. Based in Alié et al., 2018; Hiebert et al., 2019 and Zeng et al.,  
550 2006

551

552 **Figure.2 Coloniality in the genus *Symplegma*.** (A) *Symplegma rubra* colony characterized by its  
553 red color. (B) *Symplegma brakenhielmi* colony characterize by its greenish color. (C) Larva of *S.*  
554 *rubra* after be released by the colony. (D) Larva of *S. rubra* after the settlement and metamorphosis  
555 (E) Larva of *S. brakenhielmi* after the settlement and metamorphosis. (F) Ozooid of *S. rubra*  
556 during the formation of the blood vessels system. (G) Formation of the new bud in *S. rubra*. (H)  
557 Formation of the new bud in *S. brakenhielmi*. *a: ampullae; b:bud; o: ocellus; t: tunic; v: blood*  
558 *vessel. Otholito; z: zooid; zp: zooid primordium*. Scale bar is 500 µm in A and B; 250 µm in C, D,  
559 E and F; 350 µm in G and F.

560

561 **Figure. 3 Hypothetical model of hematopoiesis in *Symplegma*.** In *Symplegma rubra* were  
562 observed blood cell types similar to *Symplegma brakenhielmi* blood cells and another colonial  
563 tunicates. Living hemoblast stained with neutral red (A). Fixed hemoblast stained with Hematoxylin  
564 and eosine (H&E) (B) and giemsa (C). Living hemocyte 1 stained with neutral red (D). Fixed  
565 hemocyte 1 stained with H&E (E) and giemsa (F). Living hemocyte 2 stained with neutral red (G).  
566 Fixed hemocyte 1 stained with H&E (H) and giemsa (I). Living hyaline amebocyte stained with  
567 neutral red (J). Fixed hemocyte 1 stained with H&E (K) and giemsa (L). Living morula stained with  
568 neutral red (M). Fixed hemocyte 1 stained with H&E (N) and giemsa (O). Living macrophage-like



569 cell stained with neutral red (P). Fixed macrophage-like cell stained with H&E (Q) and giemsa (R).  
570 Living granular amebocyte stained with neutral red (s). Fixed macrophage-like cell stained with  
571 H&E (T). Living nephrocyte stained with neutral red (U). Fixed nephrocyte stained with H&E (V)  
572 and giemsa (W). Living pigment cell stained with neutral red (X-Y). Fixed pigment cell stained  
573 with H&E (Z) and giemsa (AA). The hypothetical model of hematopoiesis is based in the cellular  
574 morphology of blood cells, frequency and proliferation observed in *S. brakenhielmi* and *S.rubra*.  
575 The hemoblast is proposed as the totipotent hematopoietic stem cell. The hemocyte 1 is propose as  
576 the precursor of the undifferentiated comamitted cells. These blood cells are the progenitors of the  
577 there genera blood cell lineages, phagocytes, allorecognition and storage cells. Scale bar is 1  $\mu\text{m}$  in  
578 A and B; 2  $\mu\text{m}$  in C and from X to AA; 3  $\mu\text{m}$  from E to P, and from T to W; 4  $\mu\text{m}$  in Q and R; 6  $\mu\text{m}$   
579 in S.

580

581 **Figure.4 Buds morphogenesis in *Symplegma*.** (A) The buds in *Symplegma rubra* are forming by  
582 paleal budding (i.e. buds are forming by the evagination of branchial and external epitheliums in the  
583 parental bud). Bud in the stage 3 or double vesicle is attached to its parental bud in stage 6. (B) The  
584 bud in stage 4 moved apart from the parental bud and it is attached to a near blood vessel. (C) Bud  
585 in stage 3 of *S. rubra*, the internal vesicle in in formation. Mostly of the cells observed inside the  
586 bud are hyaline amebocytes (HA), hemoblasts (HE) and a pigment cell (PC). (D) Bud in stage 4 of  
587 *S. rubra* HA, HE, MLC are between the external epithelium and the internal epithelium, at this  
588 stage there are morula cells (MC). (E) Buds in *Symplegma brakenhielmi* can be formed by paleal  
589 budding or vascular budding as is shown. (F) Vascular bud from a *S.brakenhielmi* colony. (G) Bud  
590 in stage 3 of *S. brakenhielmi*. Stage known as double vesicle has inside HA, PC and HE, also  
591 Macophage-like cells are entering in the bud. (H) Bud in stage 3 of *Symplegma brakenhielmi*. Stage  
592 known as double vesicle has inside HA, PC and HE, also Macophage-like cells are entering in the  
593 bud. *b:bud; pb: parental bud; v: blood vessel*. Scale bar is 50  $\mu\text{m}$  in A and B; 10  $\mu\text{m}$  in C; 20  $\mu\text{m}$   
594 from D to H.

595 **Figure.5 Resorption of old zooids in *Symplegma*.** The resorption process of old zooids is similar in th  
596 species *Symplegma rubra* and *Symplegma brakenhielmi*. (A,D) Old zooid at the stage 11.1 (12 hours), the  
597 first step of resorption. Oral siphons closure and starting the antero-posterior contraction. (B,E) Old zooid at  
598 stage 11.2 (12 hours). The contraction of body continues and the zooid reduces size. It is possible to observe  
599 an empty tunicate, probably because many cell including pigment cells were phagocytosed and moving outside  
600 from the old zooid. (C,F) Stage 11.3 the zooid continue reducing its size, the tunicate is more transparent and  
601 the hear beat is slower and stops progressively. (G) Old zooid starting the anterior-posterior contraction, the  
602 oral siphon is already close. Macrophage-like cells (MLC) are ingression and accumulation around the  
603 pharynx and the stomach. (G') Magnification of the closed oral siphon. (G'') Magnification of the pharynx,  
604 which start by the disintegration process of the epitheliums. (H) Old zooid in an advance resorption process.  
605 The body contraction is increasing. MLCs are increasing their proportion around the pharynx and the  
606 stomach. (H') Magnification of the endostile. (H'') Magnification of the stigmas. *a: atrial siphon; e:*  
607 *endostyle; o: oral siphon; MLC; macriphage-like cell; p: pharynx; s: stigma; st: stomach; t: tentacles.* Scale  
608 bar is 250  $\mu$ m from A to D; 600  $\mu$ m from E to F; 50  $\mu$ m G and H; 30  $\mu$ m in G' and G''; 20  $\mu$ m in H' and  
609 H''.

610

611 **Figure.6 Proportion of blood cells in buds and in aging zooids.** The proportion of blood cells is  
612 different between buds and aging zooids. Blood cells with undifferentiated characteristic as HE and  
613 HA are statistically more frequent in buds than in aging zooids. In contrast in aging zooids are more  
614 frequent MLC and MC. The proportion of storage cells (N,P) is variable. Pigment cells are  
615 statistically more frequent in buds, moreover nephrocytes have different results between *Symplegma*  
616 species. *S. brakenhielmi* has more Ns in aging zooids than in buds, the contrary to *S.rubra*.

617

618 **Figure.7 Hypothetical model of aging in *Symplegma*.** (A) The aging in *Symplegma* colonies  
619 begins with the siphon closure followed by the anterior-posterior contraction around the  
620 longitudinal axis of the zooid. Macrophage-like cells (MLC) migrate to the zooid and the internal  
621 tissues start to disintegrate. (B) After the epithelial disintegration, these cells start apoptosis. The

622 apoptotic bodies are phagocyted by the MLCs that migrated and increase the proportion MLCs in  
623 the aging zooid. Some types of blood cells show signals of DNA fragmentation by TUNEL, inside  
624 the aging zooid and the vessels. The heart-beating decrease and finally the internal tissues are  
625 phagocyted, and probably this phagocyted material is recycled by the colony.

626

627 **Video. 1 Blood cells behavior from Symplegma rubra.** Majority of the cells are morula cells,  
628 which a circular shape that change with the movements of the cells. Amebocyte located in the  
629 middle, has a dynamic movement, at the final of the video pseudopod are visible. Living cells are  
630 with natural colors, in the extracellular matrix laminin. Link to watch the video:  
631 <https://drive.google.com/file/d/14anft05kpxk5HxjXKtTeZ3ihgKDoWlq4/view?usp=sharing>.

632

633 **Video. 2 Amebocytes behaviors.** Three amebocytes are showing dynamic movements, pseudopods  
634 are visible. Cellular movements are related with drastic change in cytoplasm shape and  
635 pseudopod extensions. Living cells are with natural colors, in the extracellular matrix laminin. Link  
636 to watch the video:  
637 <https://drive.google.com/file/d/1HXQSVc6jCwvHBmuAek02bngN11eaJ6m5/view?usp=sharing>.

638

639

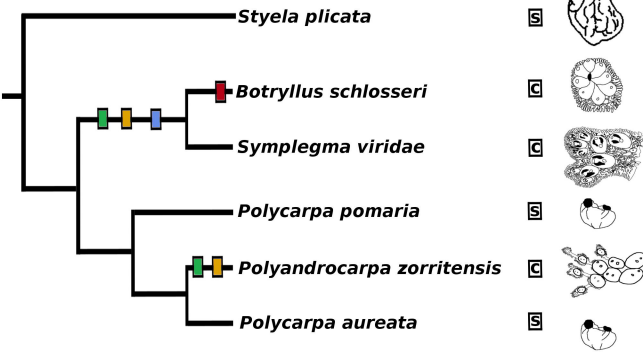

-  Blood cells diversification in colonial animals
-  Budding and extracorporeal tissues that interconnect the zooids
-  Programmed cell death of old zooids and recycling tissues by phagocytosis
-  Synchronize budding by temporal regulation of blood cell types

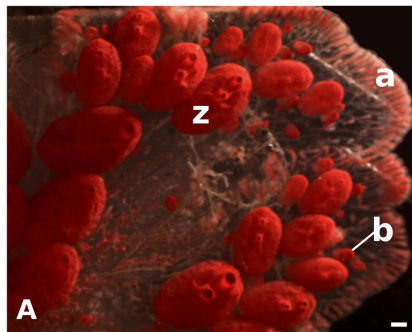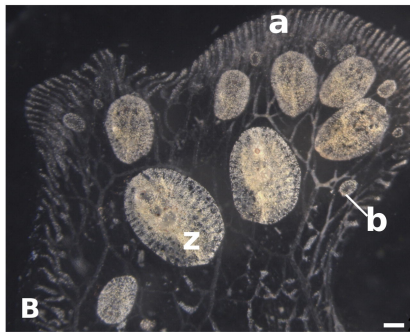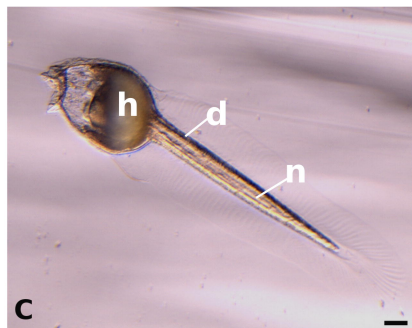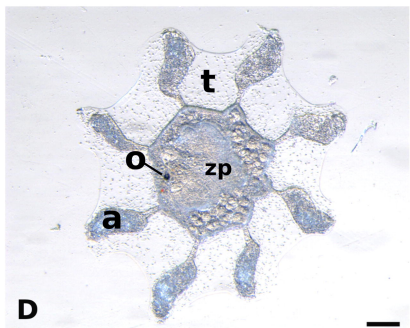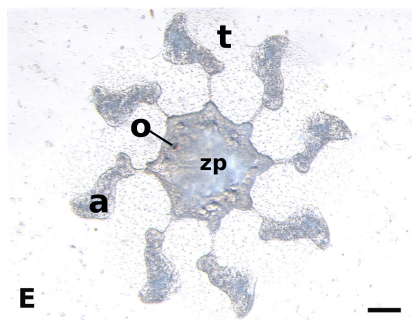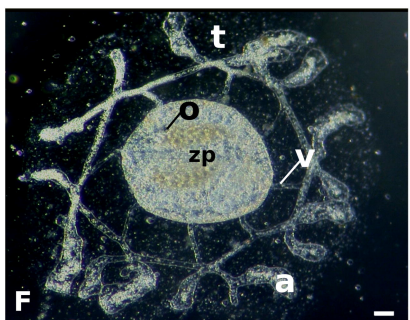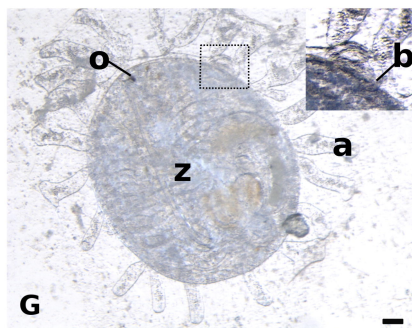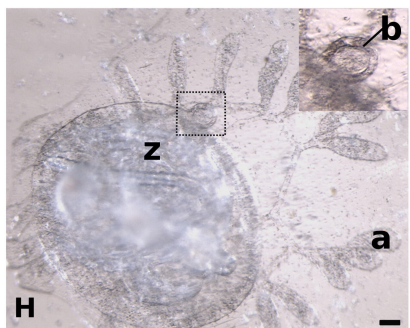

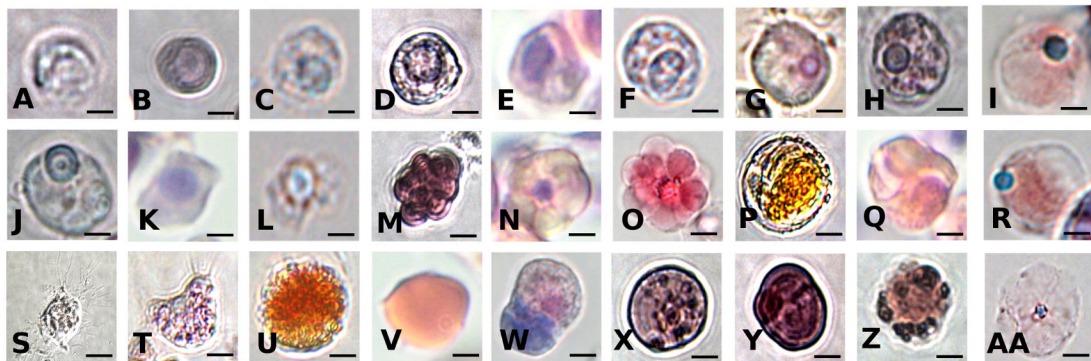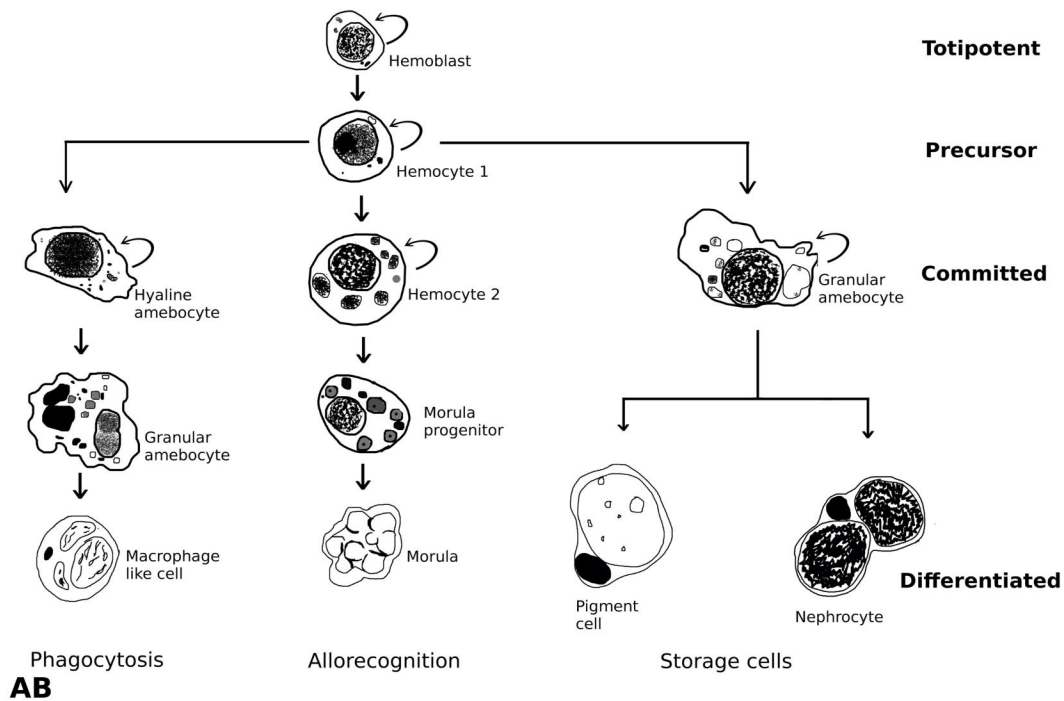

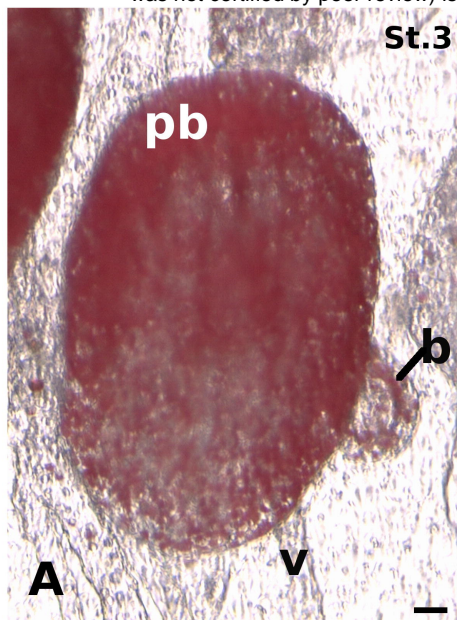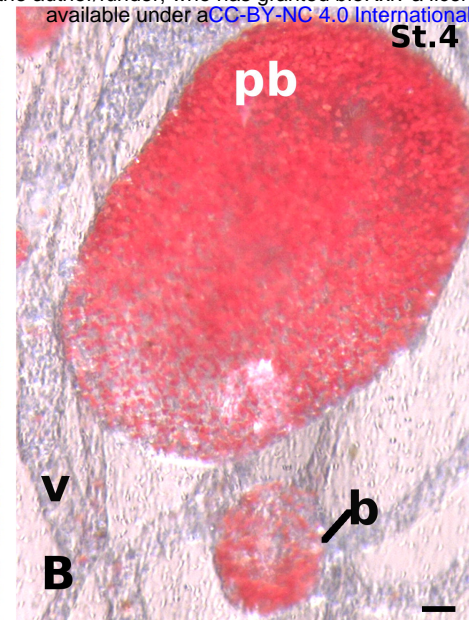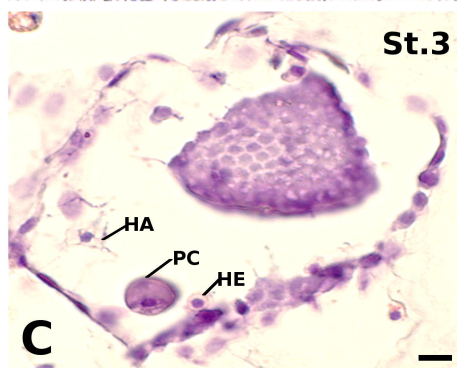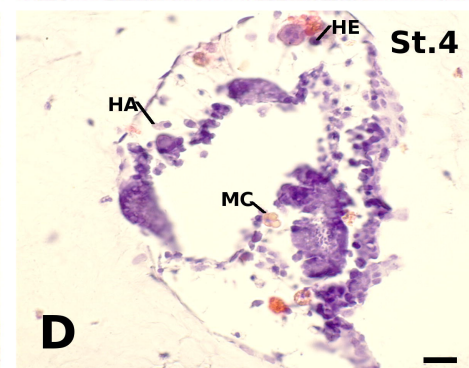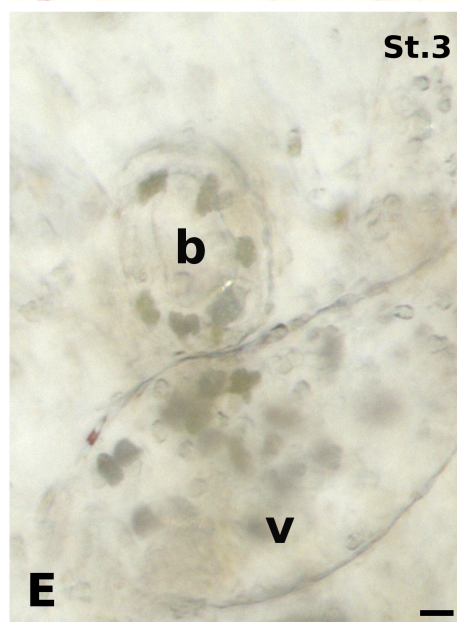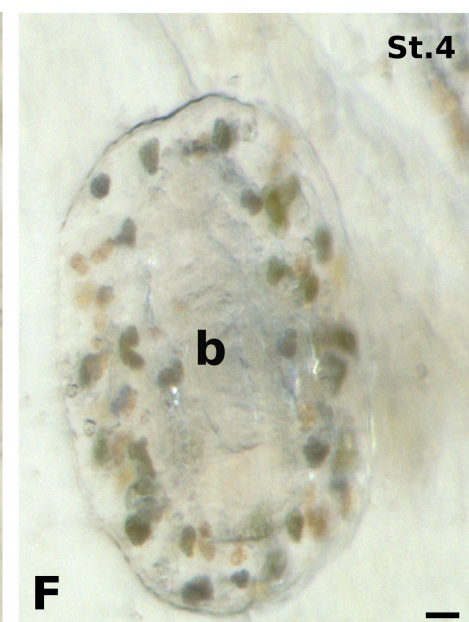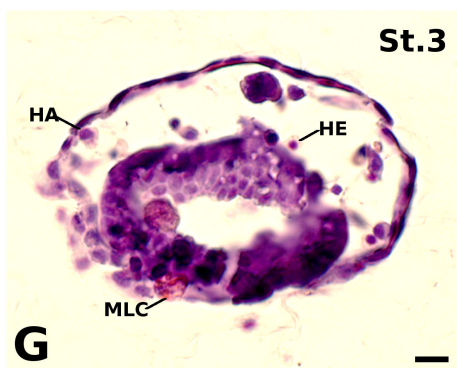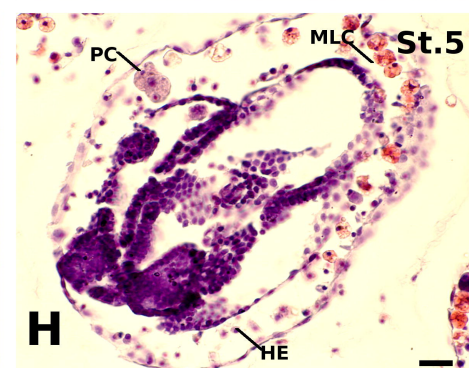

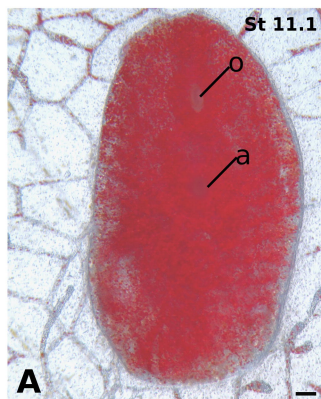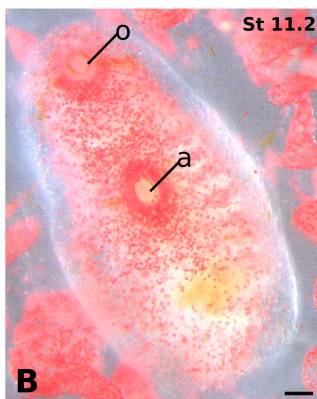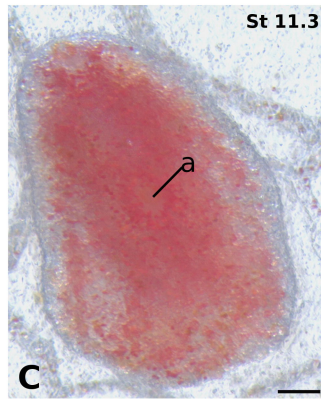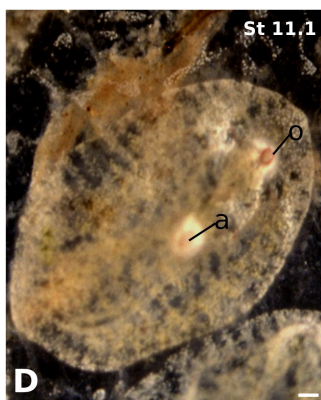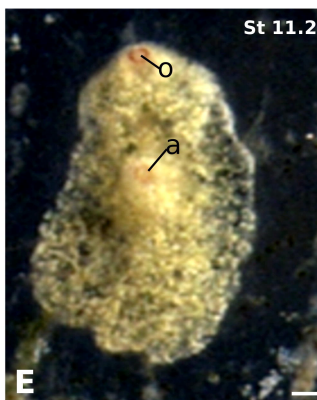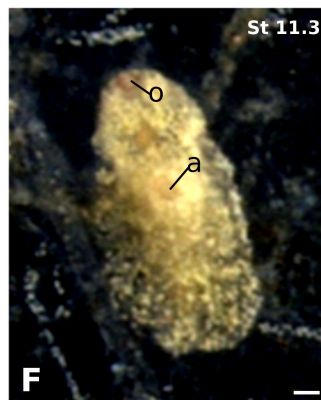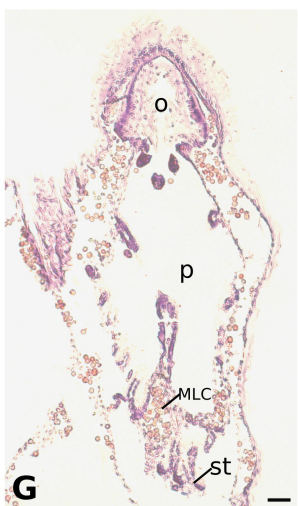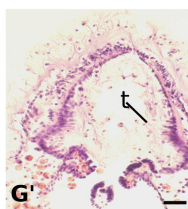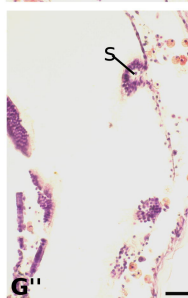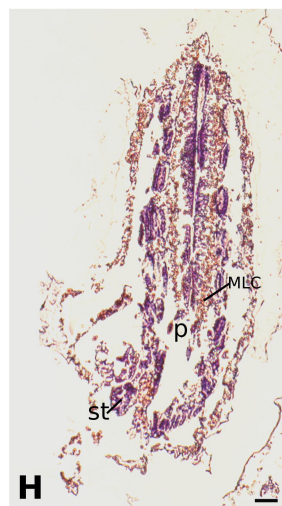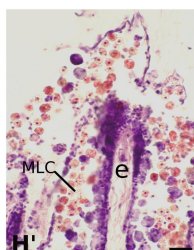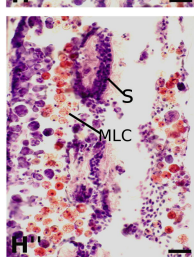



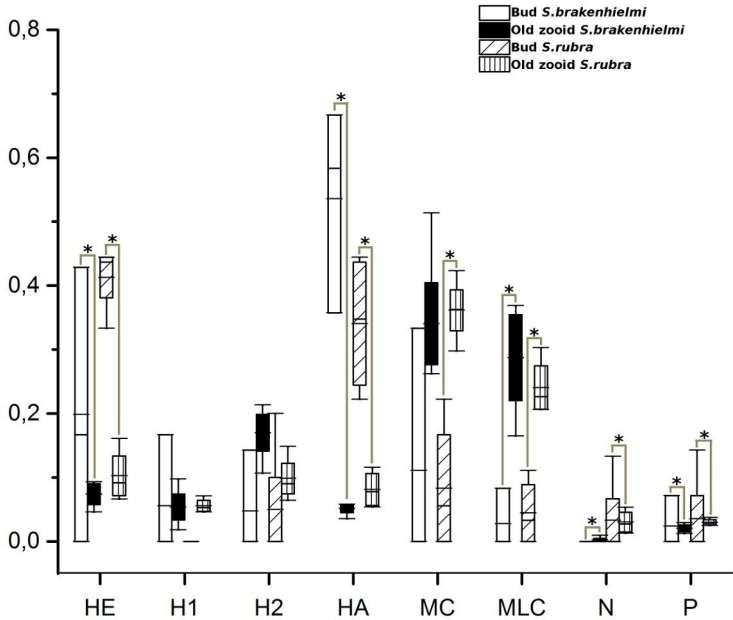

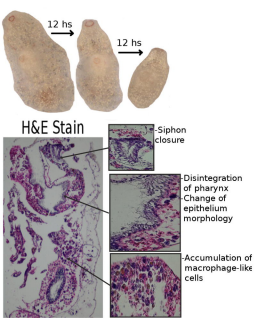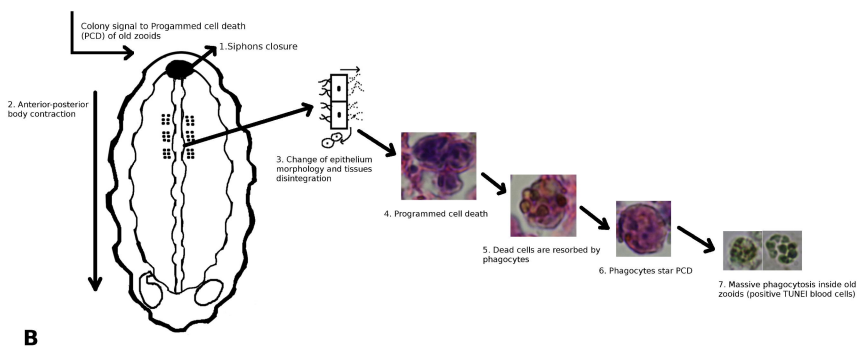

**A**

**B**
